# Supplementary material for: Fast and non-invasive conductivity determination by the dielectric response of reduced graphene oxide: an electrostatic force microscopy study
Source: Royal Society of Chemistry journal article supplement (doi:10.1039/c2nr32640j), 2012-01-01
Supplement: c2nr32640j.pdf [file c2nr32640j.pdf]

# Electronic Supplementary Information

## **Fast and non-invasive conductivity determination by the dielectric response of reduced graphene oxide: an Electrostatic Force Microscopy study**

By *Cristina Gómez-Navarro\**, *Francisco J. Guzmán-Vázquez*, *Julio Gómez-Herrero*, *Juan J. Saenz* and *G. M. Sacha*

### **Sample preparation**

Graphite oxide was prepared by Hummer's method, diluted in water and treated with mild sonication to obtain single layers. This solution was then deposited on a SiO<sub>2</sub>/Si substrate previously functionalized with APTS (Aminopropyltriethoxysilane). SiO<sub>2</sub>/Si substrate had been decorated previously with a gold marker structure with a 10 μm periodicity by electron beam lithography.

### **EFM characterization**

Measurements were done under a nitrogen atmosphere, with humidity <2% using a Nanotec Atomic Force Microscope using Pt covered tips with a nominal force constant of 2Nm<sup>-1</sup>. Amplitude of oscillation was kept always under 7 nm in order to be in a low amplitude regime where the following expression applies:

$$\delta\omega(z, V) = \frac{\omega_0}{2k} \frac{\partial F(z, V)}{\partial z} = A(z)(V - \phi)^2$$

### **Parabola parameters from two frequency shift images**

In the second mode of EFM described in the main text, for a faster characterization of the layers, we acquired frequency shift maps at two tip bias voltages (+9, -9V). The frequency shift on each feature of the substrate follows the equation above, which describes a parabola with curvature A and vertex Φ. These two parameters can be extracted given the acquired data at two bias voltages δω(± 9V) according to:

$$\phi = \frac{9\left(\sqrt{\frac{\delta\omega(-9)}{\delta\omega(+9)}} - 1\right)}{1 + \sqrt{\frac{\delta\omega(-9)}{\delta\omega(+9)}}}$$

$$A = \frac{\delta\omega(-9)}{(9 + \phi)^2}$$

### Spherical tip model for our sample geometry

In order to ensure that the spherical tip model is a suitable approximation for our experimental geometrical configuration, we have performed a detailed previous analysis. Our study on the influence of the finite value of  $L$  reveals that the effects on the electrostatic forces involved in our set up differ when considering a spherical tip ( $F_{sp}$ ) or a realistic macroscopic tip ( $F_{tip}$ ); decreasing  $L$  induces a significant increasing of  $F_{tip}$ . This fact implies that the macroscopic shape (length and angle of the cone) of the tip is the element that is related to the interaction between the tip and the metallic plate. Focusing on the case where  $L=300\text{nm}$ , we found that the influence of the dielectric thickness almost compensates the difference between  $F_{sp}$  and  $F_{tip}$  implying that a spherical tip over a thin film with  $L \rightarrow \infty$  is a good model for our particular case.

More in detail, we compare  $F$  for the macroscopic ( $F_{tip}$ ) and spherical tip ( $F_{sp}$ ) at  $D=1\text{nm}$  as a function of  $h$  and  $\epsilon_1$ . Focusing on the limit where  $L \rightarrow \infty$ , we obtain that there is a huge difference between  $F_{tip}$  and  $F_{sp}$ , being  $F_{sp}$  the strongest interaction. In the case of the sphere (tip apex), the surface charge density is placed all around the tip, and the farthest side of the tip is at  $z=2R_{tip}$ . In the case of the macroscopic tip (cone included), the surface charge density is distributed between the tip apex and  $z=L_{tip}$ , which is a much larger distance than  $z=R_{tip}$ . Analyzing now the effect of smaller  $L$  values, we can see that the effect of the finite length of  $L$  affects in a different way  $F_{sp}$  and  $F_{tip}$ . Decreasing of  $L$  induces a significant increasing of  $F_{tip}$ . However,  $F_{sp}$  keeps constant as  $L$  decreases. This fact implies that the macroscopic shape ( $L$  and  $\epsilon_1$ ) of the tip is the element that is related to the interaction between the tip and the metallic plate. We also obtained that the influence of the  $\text{SiO}_2$  thickness almost compensates the difference between  $F_{sp}$  and  $F_{tip}$  where  $L=300\text{nm}$ . This implies that a spherical tip over a thin film with  $L \rightarrow \infty$  is a good model for the macroscopic

tip over a graphene flake and a SiO<sub>2</sub> thickness of 300nm on a highly doped Si substrate.

The details of this study can be found in J. Phys. Cond. Matt. 24, 155303, 2012
